# Supplementary material
Source: PubMed Central journal article supplement (PMC8742764)
Supplement: NIHMS1749833-supplement-supinfo.pdf [file NIHMS1749833-supplement-supinfo.pdf]

**Supplementary Material S1:** Systematic literature search strategy for hearing impairment and objectively measured physical activity

**Topic:** Hearing Loss and Physical Activity  
**Databases:** Ovid Medline, Embase.com, Cochrane Library  
**Language:** All  
**Date:** All  
**Results:** Covidence, RIS format  
**Search Date:** 16 October 2019  
**Searches developed by:** Lori Rosman, MLS, Lead Informationist, Welch Medical Library, Johns Hopkins University

**Ovid Medline**

**Date run: 16 October 2019: 325 results**

1. exp Aging/
2. exp Aged/
3. exp Geriatrics/
4. exp Age Factors/
5. (ageing or laterlife or laterlife or "late life" or "later life" or elder\* or Geron\* or Geriatr\* or senior\* or older).tw.
6. (old\* adj3 (age\* or adult\* or population\* or communit\* or people\* or person\*)).tw.
7. ((aging or aged) adj3 (adult\* or population\* or communit\* or people\* or person\*)).tw.
8. (age factor\* or age related).tw.
9. or/1-8
10. Auditory Threshold/
11. exp Hearing Loss/
12. exp Hearing Loss, Noise-Induced/
13. exp Persons With Hearing Impairments/
14. exp PRESBYCUSIS/
15. (auditory adj3 (comprehension or defect\* or deficit\* or threshold\*)).tw.
16. (hearing adj3 (acuit\* or deficit\* or disorder\* or dysfunction\* or impair\* or loss\*)).tw.
17. ("hard of hearing" or noise injur\* or presbycus\* or presbyacus\* or hypoacus\* or sensorineural or ARHL).tw.
18. or/10-17
19. exp Accelerometry/
20. exp exercise/
21. exp physical conditioning, human/
22. exp running/
23. exp walking/
24. Motor Activity/
25. exp Physical Fitness/
26. (accelerometer\* or exercis\* or physical condition\* or running or walking or motor activit\* or physical fitness).tw.
27. or/19-26
28. 9 and 18 and 27

\*\*\*\*\*

**Embase.com**

**Date run: 16 October 2019: 887 results**

1. 'aging'/exp
2. 'aged'/exp
3. 'geriatrics'/exp
4. 'growth, development and aging'/exp
5. (aging OR ageing OR aged):ab,ti,kw
6. (old\* NEAR/3 (age\* OR adult\* OR population\* OR communit\* OR people\* OR person\*)):ab,ti,kw
7. (latelife OR laterlife OR 'late life' OR 'later life' OR elder\* OR geron\* OR geriatr\* OR senior\* OR older):ab,ti,kw
8. ('age factor\*' OR 'age related'):ab,ti,kw
9. #1 OR #2 OR #3 OR #4 OR #5 OR #6 OR #7 OR #8
10. 'auditory threshold'/exp
11. 'hearing impairment'/exp
12. 'noise injury'/exp
13. 'hearing impaired person'/exp
14. 'presbycusis'/exp
15. (auditory NEAR/3 (comprehension OR defect\* OR deficit\* OR threshold\*)):ab,ti,kw
16. (hearing NEAR/3 (acuit\* OR deficit\* OR disorder\* OR dysfunction\* OR impair\* OR loss\*)):ab,ti,kw
17. ("hard of hearing" OR "noise injur\*" OR presbycus\* OR presbyacus\* OR hypoacus\* OR sensorineural OR ARHL):ab,ti,kw
18. #10 OR #11 OR #12 OR #13 OR #14 OR #15 OR #16 OR #17
19. 'accelerometry'/exp
20. 'exercise'/exp
21. 'running'/exp
22. 'walking'/exp
23. 'motor activity'/de
24. 'fitness'/exp
25. (accelerometer\* OR exercis\* OR "physical condition\*" OR running OR walking OR "motor activit\*" OR "physical fitness"):ab,ti,kw
26. #19 OR #20 OR #21 OR #22 OR #23 OR #24 OR #25
27. #9 AND #18 AND #26

\*\*\*\*\*

**Cochrane Library**

**Date run: 16 October 2019: (82 reviews, 73 trials)**

- #1 MeSH descriptor: [Aging] explode all trees
- #2 MeSH descriptor: [Aged] explode all trees
- #3 MeSH descriptor: [Geriatrics] explode all trees
- #4 MeSH descriptor: [Age Factors] explode all trees

- #5 (aging or ageing or aged)
- #6 (old\* NEAR/3 (age\* or adult\* or population\* or communit\* or people\* or person\*))
- #7 (latelife or laterlife or "late life" or "later life" or elder\* or geron\* or geriatr\* or senior\* or older)
- #8 ("age factor" or "age factors" or "age related")
- #9 {OR #1-#8}
- #10 MeSH descriptor: [Auditory Threshold] this term only
- #11 MeSH descriptor: [Hearing Disorders] explode all trees
- #12 MeSH descriptor: [Hearing Loss] explode all trees
- #13 MeSH descriptor: [Hearing Loss, Noise-Induced] explode all trees
- #14 MeSH descriptor: [Persons With Hearing Impairments] explode all trees
- #15 MeSH descriptor: [Presbycusis] explode all trees
- #16 (auditory NEAR/3 (comprehension or defect\* or deficit\* or threshold\*))
- #17 (hearing NEAR/3 (acuit\* or deficit\* or disorder\* or dysfunction\* or impair\* or loss\*))
- #18 ("hard of hearing" or (noise NEXT/1 injur\*) or presbycus\* or presbyacus\* or hypoacus\* or sensorineural or ARHL)
- #19 {OR #10-#18}
- #20 MeSH descriptor: [Accelerometry] explode all trees
- #21 MeSH descriptor: [Exercise] explode all trees
- #22 MeSH descriptor: [Physical Conditioning, Human] explode all trees
- #23 MeSH descriptor: [Running] explode all trees
- #24 MeSH descriptor: [Walking] explode all trees
- #25 MeSH descriptor: [Motor Activity] this term only
- #26 MeSH descriptor: [Physical Fitness] explode all trees
- #27 (accelerometer\* or exercis\* or (physical NEXT/1 condition\*) or running or walking or (motor NEXT/1 activit\*) or "physical fitness")
- #28 {OR #20-#27}
- #29 #9 AND #19 AND #28
